# Supplementary material for: Cross-modal contrastive learning for unified placenta analysis using photographs
Source: PubMed Central journal article supplement — Patterns (N Y). 2024 Nov 19;5(12):101097. doi: 10.1016/j.patter.2024.101097 (PMC11701861; doi:10.1016/j.patter.2024.101097), 2024-11-19
Supplement: mmc1.pdf [file mmc1.pdf]

**Patterns, Volume 5**

**Supplemental information**

**Cross-modal contrastive learning  
for unified placenta analysis using photographs**

**Yimu Pan, Manas Mehta, Jeffery A. Goldstein, Joseph Ngonzi, Lisa M. Bebell, Drucilla J. Roberts, Chrystalle Katte Carreon, Kelly Gallagher, Rachel E. Walker, Alison D. Gernand, and James Z. Wang**

## Supplemental Methods

In this section, we provide additional results to support the analysis of PlacentaCLIP.

### Including Stage 1 as Negative Samples in MIR and FIR

Table S1 presents the performance of MIR and FIR when stage 1 is included as a negative case. In the main text, stage 1 is excluded from the metric computation. We observe that including stage 1 as negative increases the standard deviation of the model's results, while the mean performance remains largely unchanged. This outcome is expected, as stage 1 is more challenging to identify.

### Analysis of Variance for Combined Factors of Introduced Artificial Corruptions

We conducted an Analysis of Variance (ANOVA) analysis considering up to three combined effects, applied in a fixed order of corruption. These combined effect results encompass 175 comparisons for each task. Given the large size of the table containing these comparisons, it is provided separately in the Supplemental Information, allowing readers to filter. Only the significant variables with a P-value  $< 0.05$  are shown here. Calculating all interactions for the 10 proposed corruptions in all possible orders would result in  $10! = 3,628,800$  comparisons, which would be impractical. All analyses are conducted on PlacentaCLIP, in contrast to the more robust PlacentaCLIP+, to better reveal the differences in robustness.

Overall, the application of individual artifacts consistently impacts model performance, but the additional application of artifacts rarely affects performance (6.1% to 18.2% of the time). The model demonstrates the highest robustness in the sepsis classification task, with only 6.1% of the combined variables (Table S6) showing a statistically significant effect on performance. Conversely, the model exhibits the least robustness in the meconium classification task, where 18.2% of the combined variables (Table S2) show a statistically significant effect. Performance in the meconium classification task (Table S2) is most impacted by the additional application of color-based artifacts, such as saturation. In contrast, performance in other tasks (Table S3, Table S4, Table S5, and Table S6) is less affected by color-based artifacts. The performance in chorioamnionitis classification is less affected by the additional application of brightness artifacts compared to FIR (Table S4) and MIR (Table S5).

Due to the complexity of analyzing combined effects, more insights are drawn from direct performance comparisons discussed in the main text.

### Effect of Class Distribution on Model Performance Across Different Demographic Groups

We conducted an additional analysis on the percentage of positive samples for each placenta feature and clinical outcome across different races in the internal validation set to identify any biases that might contribute to the model performing better on the 'Unknown' group than on the 'White' group. From Table S7, we observe that the 'Unknown' group has a significantly higher positive sample rate than the 'White' group for sepsis. Since our model performs best on the sepsis classification task, this disparity in class distribution is a contributing factor to the performance difference.

Table S1: **The performance of PlacentCLIP on MIR and FIR with and without discarding stage 1**

|                 | mAP   | STD  | AUC   | STD  |
|-----------------|-------|------|-------|------|
| FIR w/o stage 1 | 80.17 | 1.92 | 84.97 | 0.77 |
| FIR w/ stage 1  | 78.47 | 4.81 | 82.72 | 2.71 |
| MIR w/o stage 1 | 77.84 | 0.98 | 77.89 | 0.42 |
| MIR w/ stage 1  | 79.11 | 2.77 | 79.97 | 3.35 |

The standard deviation increases when stage 1 is included as negative samples but the mean performance did not change too much. STD: standard deviation. mAP: mean average precision. AUC: area under the receiver operating characteristic curve.

**Table S2: Significant variables in the combined ANOVA analysis for the effects of synthetic artifacts on the performance of meconium**

| Variables                          | SS        | DoF   | F        | P-value |
|------------------------------------|-----------|-------|----------|---------|
| Blood                              | 1064.381  | 1.000 | 351.344  | 0.000   |
| Glare                              | 179.239   | 1.000 | 59.165   | 0.000   |
| Shadow                             | 2238.017  | 1.000 | 738.753  | 0.000   |
| Defocus blur                       | 15374.586 | 1.000 | 5075.035 | 0.000   |
| Motion blur                        | 3786.043  | 1.000 | 1249.744 | 0.000   |
| Zoom blur                          | 704.864   | 1.000 | 232.670  | 0.000   |
| Contrast                           | 487.091   | 1.000 | 160.785  | 0.000   |
| Brightness                         | 2102.790  | 1.000 | 694.115  | 0.000   |
| Saturation                         | 1250.147  | 1.000 | 412.664  | 0.000   |
| JPEG                               | 7500.377  | 1.000 | 2475.818 | 0.000   |
| Blood : Shadow                     | 15.125    | 1.000 | 4.993    | 0.026   |
| Blood : Defocus blur               | 13.441    | 1.000 | 4.437    | 0.036   |
| Blood : Motion blur                | 14.585    | 1.000 | 4.815    | 0.029   |
| Blood : Saturation                 | 35.000    | 1.000 | 11.553   | 0.001   |
| Blood : JPEG                       | 62.768    | 1.000 | 20.719   | 0.000   |
| Glare : Shadow                     | 13.714    | 1.000 | 4.527    | 0.034   |
| Glare : Defocus blur               | 45.330    | 1.000 | 14.963   | 0.000   |
| Glare : Motion blur                | 56.777    | 1.000 | 18.742   | 0.000   |
| Glare : Zoom blur                  | 12.141    | 1.000 | 4.008    | 0.046   |
| Glare : Brightness                 | 20.076    | 1.000 | 6.627    | 0.010   |
| Glare : JPEG                       | 30.888    | 1.000 | 10.196   | 0.001   |
| Shadow : Zoom blur                 | 16.664    | 1.000 | 5.501    | 0.019   |
| Shadow : Contrast                  | 47.170    | 1.000 | 15.570   | 0.000   |
| Shadow : Brightness                | 170.366   | 1.000 | 56.236   | 0.000   |
| Shadow : JPEG                      | 38.234    | 1.000 | 12.621   | 0.000   |
| Defocus blur : Motion blur         | 386.506   | 1.000 | 127.583  | 0.000   |
| Defocus blur : Zoom blur           | 50.099    | 1.000 | 16.537   | 0.000   |
| Defocus blur : Contrast            | 21.960    | 1.000 | 7.249    | 0.007   |
| Defocus blur : JPEG                | 186.820   | 1.000 | 61.668   | 0.000   |
| Motion blur : JPEG                 | 83.677    | 1.000 | 27.621   | 0.000   |
| Zoom blur : Saturation             | 12.841    | 1.000 | 4.239    | 0.040   |
| Contrast : Brightness              | 13.016    | 1.000 | 4.297    | 0.039   |
| Blood : Defocus blur : Brightness  | 14.621    | 1.000 | 4.826    | 0.028   |
| Blood : Defocus blur : JPEG        | 38.493    | 1.000 | 12.706   | 0.000   |
| Blood : Motion blur : JPEG         | 12.135    | 1.000 | 4.006    | 0.046   |
| Blood : Zoom blur : JPEG           | 11.805    | 1.000 | 3.897    | 0.049   |
| Glare : Shadow : Saturation        | 13.342    | 1.000 | 4.404    | 0.036   |
| Glare : Motion blur : JPEG         | 15.246    | 1.000 | 5.032    | 0.025   |
| Glare : Saturation : JPEG          | 13.182    | 1.000 | 4.351    | 0.037   |
| Shadow : Defocus blur : Brightness | 43.748    | 1.000 | 14.441   | 0.000   |

Overall, the individual application of artifacts consistently produces a significant effect on model performance. However, the additional application of artifacts less frequently affects model performance (18.2% of the time). The performance of meconium is particularly affected by color artifacts such as brightness, contrast, and saturation. JPEG compression also causes an additional performance drop. DoF: degree of freedom. SS: sum of squares. F: F-statistics.

**Table S3: Significant variables in the combined ANOVA analysis for the effects of synthetic artifacts on the performance of chorioamnionitis**

| Variables                       | SS       | DoF   | F        | P-value |
|---------------------------------|----------|-------|----------|---------|
| Blood                           | 1373.483 | 1.000 | 236.825  | 0.000   |
| Glare                           | 601.677  | 1.000 | 103.745  | 0.000   |
| Shadow                          | 24.980   | 1.000 | 4.307    | 0.038   |
| Defocus blur                    | 6184.953 | 1.000 | 1066.450 | 0.000   |
| Motion blur                     | 2814.474 | 1.000 | 485.290  | 0.000   |
| Zoom blur                       | 710.379  | 1.000 | 122.488  | 0.000   |
| Contrast                        | 229.095  | 1.000 | 39.502   | 0.000   |
| Brightness                      | 1970.601 | 1.000 | 339.784  | 0.000   |
| Saturation                      | 109.970  | 1.000 | 18.962   | 0.000   |
| JPEG                            | 3944.526 | 1.000 | 680.141  | 0.000   |
| Glare : Defocus blur            | 268.935  | 1.000 | 46.372   | 0.000   |
| Glare : Motion blur             | 59.448   | 1.000 | 10.250   | 0.001   |
| Glare : Zoom blur               | 24.644   | 1.000 | 4.249    | 0.040   |
| Glare : JPEG                    | 33.307   | 1.000 | 5.743    | 0.017   |
| Shadow : Defocus blur           | 45.996   | 1.000 | 7.931    | 0.005   |
| Shadow : JPEG                   | 55.077   | 1.000 | 9.497    | 0.002   |
| Defocus blur : Motion blur      | 138.841  | 1.000 | 23.940   | 0.000   |
| Defocus blur : Zoom blur        | 27.204   | 1.000 | 4.691    | 0.031   |
| Defocus blur : JPEG             | 209.837  | 1.000 | 36.182   | 0.000   |
| Motion blur : Zoom blur         | 39.032   | 1.000 | 6.730    | 0.010   |
| Motion blur : JPEG              | 22.394   | 1.000 | 3.861    | 0.050   |
| Blood : Shadow : Motion blur    | 25.051   | 1.000 | 4.319    | 0.038   |
| Blood : Defocus blur : JPEG     | 22.576   | 1.000 | 3.893    | 0.049   |
| Glare : Defocus blur : Contrast | 23.719   | 1.000 | 4.090    | 0.044   |

Overall, the individual application of artifacts always produces a significant effect on model performance. However, the additional application of artifacts less frequently affects model performance (8.5% of the time). The performance of chorioamnionitis tends to be affected by additional blur or JPEG compression. DoF: degree of freedom. SS: sum of squares. F: F-statistics.

Table S4: **Significant variables in the combined ANOVA analysis for the effects of synthetic artifacts on the performance of FIR**

| Variables                         | SS        | DoF   | F        | P-value |
|-----------------------------------|-----------|-------|----------|---------|
| Blood                             | 1614.241  | 1.000 | 333.964  | 0.000   |
| Glare                             | 535.509   | 1.000 | 110.789  | 0.000   |
| Shadow                            | 1150.898  | 1.000 | 238.105  | 0.000   |
| Defocus blur                      | 11910.097 | 1.000 | 2464.035 | 0.000   |
| Motion blur                       | 3292.658  | 1.000 | 681.206  | 0.000   |
| Zoom blur                         | 968.583   | 1.000 | 200.386  | 0.000   |
| Contrast                          | 350.373   | 1.000 | 72.487   | 0.000   |
| Brightness                        | 2976.847  | 1.000 | 615.869  | 0.000   |
| Saturation                        | 402.393   | 1.000 | 83.250   | 0.000   |
| JPEG                              | 7668.328  | 1.000 | 1586.471 | 0.000   |
| Blood : Defocus blur              | 71.453    | 1.000 | 14.783   | 0.000   |
| Blood : Brightness                | 48.186    | 1.000 | 9.969    | 0.002   |
| Glare : Defocus blur              | 225.605   | 1.000 | 46.675   | 0.000   |
| Glare : Motion blur               | 116.425   | 1.000 | 24.087   | 0.000   |
| Glare : Zoom blur                 | 32.331    | 1.000 | 6.689    | 0.010   |
| Glare : JPEG                      | 21.182    | 1.000 | 4.382    | 0.037   |
| Shadow : Brightness               | 62.141    | 1.000 | 12.856   | 0.000   |
| Shadow : Saturation               | 22.735    | 1.000 | 4.704    | 0.030   |
| Defocus blur : Motion blur        | 56.735    | 1.000 | 11.738   | 0.001   |
| Defocus blur : Brightness         | 19.432    | 1.000 | 4.020    | 0.045   |
| Defocus blur : JPEG               | 20.588    | 1.000 | 4.259    | 0.039   |
| Defocus blur : Motion blur : JPEG | 30.999    | 1.000 | 6.413    | 0.012   |
| Defocus blur : Brightness : JPEG  | 19.218    | 1.000 | 3.976    | 0.047   |

Overall, the individual application of artifacts always produces a significant effect on model performance. However, the additional application of artifacts less frequently affects model performance (7.9% of the time). The performance of FIR tends to be affected by additional blur or JPEG compression. DoF: degree of freedom. SS: sum of squares. F: F-statistics.

Table S5: **Significant variables in the combined ANOVA analysis for the effects of synthetic artifacts on the performance of MIR**

| Variables                              | SS        | DoF   | F        | P-value |
|----------------------------------------|-----------|-------|----------|---------|
| Blood                                  | 2165.961  | 1.000 | 451.340  | 0.000   |
| Glare                                  | 876.761   | 1.000 | 182.698  | 0.000   |
| Shadow                                 | 392.768   | 1.000 | 81.844   | 0.000   |
| Defocus blur                           | 12153.796 | 1.000 | 2532.589 | 0.000   |
| Motion blur                            | 3499.102  | 1.000 | 729.138  | 0.000   |
| Zoom blur                              | 727.716   | 1.000 | 151.640  | 0.000   |
| Contrast                               | 119.325   | 1.000 | 24.865   | 0.000   |
| Brightness                             | 1610.976  | 1.000 | 335.693  | 0.000   |
| Saturation                             | 212.483   | 1.000 | 44.277   | 0.000   |
| JPEG                                   | 8092.322  | 1.000 | 1686.266 | 0.000   |
| Blood : Motion blur                    | 19.020    | 1.000 | 3.963    | 0.047   |
| Blood : JPEG                           | 40.062    | 1.000 | 8.348    | 0.004   |
| Glare : Shadow                         | 37.054    | 1.000 | 7.721    | 0.006   |
| Glare : Defocus blur                   | 416.777   | 1.000 | 86.847   | 0.000   |
| Glare : Motion blur                    | 140.896   | 1.000 | 29.360   | 0.000   |
| Glare : Zoom blur                      | 28.145    | 1.000 | 5.865    | 0.016   |
| Glare : Saturation                     | 19.681    | 1.000 | 4.101    | 0.043   |
| Shadow : Contrast                      | 40.752    | 1.000 | 8.492    | 0.004   |
| Shadow : Brightness                    | 108.975   | 1.000 | 22.708   | 0.000   |
| Shadow : JPEG                          | 62.753    | 1.000 | 13.076   | 0.000   |
| Defocus blur : Motion blur             | 201.530   | 1.000 | 41.995   | 0.000   |
| Defocus blur : Zoom blur               | 26.709    | 1.000 | 5.566    | 0.019   |
| Defocus blur : Brightness              | 25.252    | 1.000 | 5.262    | 0.022   |
| Defocus blur : JPEG                    | 628.988   | 1.000 | 131.067  | 0.000   |
| Motion blur : JPEG                     | 91.318    | 1.000 | 19.029   | 0.000   |
| Defocus blur : Motion blur : Zoom blur | 28.910    | 1.000 | 6.024    | 0.014   |

Overall, the individual application of artifacts always produces a significant effect on model performance, but additional applications of artifacts affect model performance less frequently (9.7% of the time). The performance of MIR tends to be affected by additional blur or JPEG compression. DoF: degree of freedom. SS: sum of squares. F: F-statistics.

**Table S6: Significant variables in the combined ANOVA analysis for the effects of synthetic artifacts on the performance of sepsis**

| Variables                               | SS       | DoF   | F       | P-value |
|-----------------------------------------|----------|-------|---------|---------|
| Blood                                   | 617.963  | 1.000 | 101.651 | 0.000   |
| Glare                                   | 886.889  | 1.000 | 145.887 | 0.000   |
| Shadow                                  | 1431.548 | 1.000 | 235.480 | 0.000   |
| Defocus blur                            | 3247.595 | 1.000 | 534.207 | 0.000   |
| Motion blur                             | 813.714  | 1.000 | 133.850 | 0.000   |
| Zoom blur                               | 217.950  | 1.000 | 35.851  | 0.000   |
| Contrast                                | 388.370  | 1.000 | 63.884  | 0.000   |
| Brightness                              | 1512.863 | 1.000 | 248.855 | 0.000   |
| Saturation                              | 170.926  | 1.000 | 28.116  | 0.000   |
| JPEG                                    | 576.612  | 1.000 | 94.849  | 0.000   |
| Blood : Defocus blur                    | 27.230   | 1.000 | 4.479   | 0.035   |
| Glare : Defocus blur                    | 145.333  | 1.000 | 23.906  | 0.000   |
| Glare : Motion blur                     | 41.600   | 1.000 | 6.843   | 0.009   |
| Glare : JPEG                            | 51.284   | 1.000 | 8.436   | 0.004   |
| Shadow : JPEG                           | 59.986   | 1.000 | 9.867   | 0.002   |
| Defocus blur : Motion blur              | 79.073   | 1.000 | 13.007  | 0.000   |
| Defocus blur : Brightness               | 50.342   | 1.000 | 8.281   | 0.004   |
| Saturation : JPEG                       | 27.838   | 1.000 | 4.579   | 0.033   |
| Shadow : Defocus blur : Brightness      | 28.600   | 1.000 | 4.705   | 0.030   |
| Defocus blur : Motion blur : Brightness | 28.522   | 1.000 | 4.692   | 0.031   |

Overall, the individual application of artifacts always produces a significant effect on model performance, but additional applications of artifacts affect model performance less frequently (6.1% of the time). The performance of sepsis tends to be affected by additional blur or JPEG compression. DoF: degree of freedom. SS: sum of squares. F: F-statistics.

**Table S7: The percentage of positive samples for each placenta feature and clinical outcome across different races in the internal validation set**

|                           | Meconium | Chorioamnionitis | FIR    | MIR    | Sepsis |
|---------------------------|----------|------------------|--------|--------|--------|
| Asian                     | 50.00%   | 57.14%           | 39.39% | 61.04% | 20.00% |
| Black or African American | 45.35%   | 52.31%           | 50.00% | 53.47% | 18.18% |
| Other                     | 49.46%   | 65.57%           | 52.00% | 58.59% | 23.53% |
| Unknown                   | 40.43%   | 57.89%           | 39.13% | 59.70% | 25.00% |
| White                     | 46.34%   | 39.66%           | 41.30% | 49.45% | 7.02%  |

FIR: fetal inflammatory response; MIR: maternal inflammatory response.



# Data S1. Photo-taking procedure at Mbarara Regional Referral Hospital

## Photographing the placenta – **FETAL** surface

- Tuck membranes under disc so they are not showing
- **Lay cord off of placenta from the shortest edge** – start by laying it straight off the closest edge of the placenta
- Arrange the cord straight/curved around the disc (**NOT** curled up); **don't let cord touch the disc or touch itself**
- Wipe the placental surface to reduce glare (make sure there is no light reflecting on the placenta's shiny surface)
- Wipe blood and clots off disc and cord
- Wipe blood off blue board
- Include entire ruler in photo (bottom)
- Include ID in photo (bottom right)

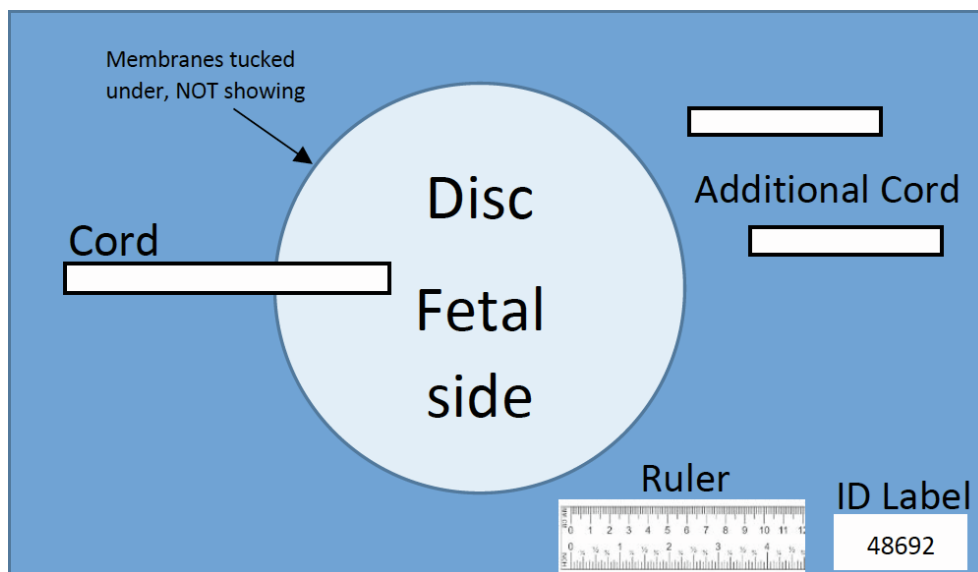

Take fetal side photo – check that image is **in focus** with **no glare** and **no shadows** – take a second photo to be sure  
Take additional, close-up photograph(s) of any visible lesions

## Photographing the placenta – **MATERNAL** surface

- Turn the disc over
- Center disc and tuck membranes and cord under disc (NO cord segments should be visible)
- Wipe blood and clots off maternal disc surface
- Wipe blood off of blue background.
- Include all fragments of the placenta if disc is not whole
- Ensure ruler and ID number are still in place in the photo and are not touching disc or cord

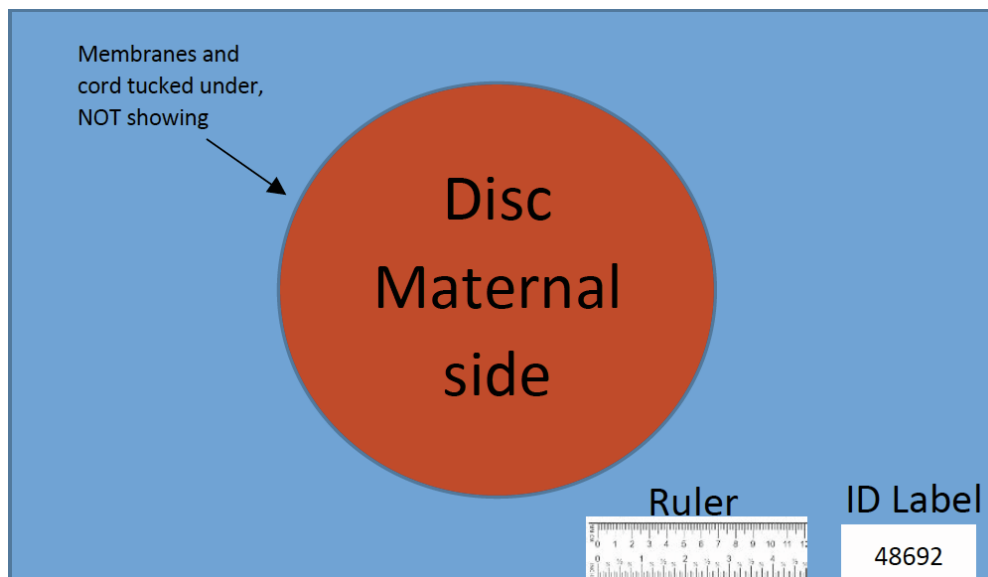

Take maternal side photo – check that image is **in focus** with **no glare** and **no shadows** – take a second photo to be sure  
Take additional, close-up photograph(s) of any visible lesions

## CHECK your photos

Look at the back of the camera, find the button with the small arrow:

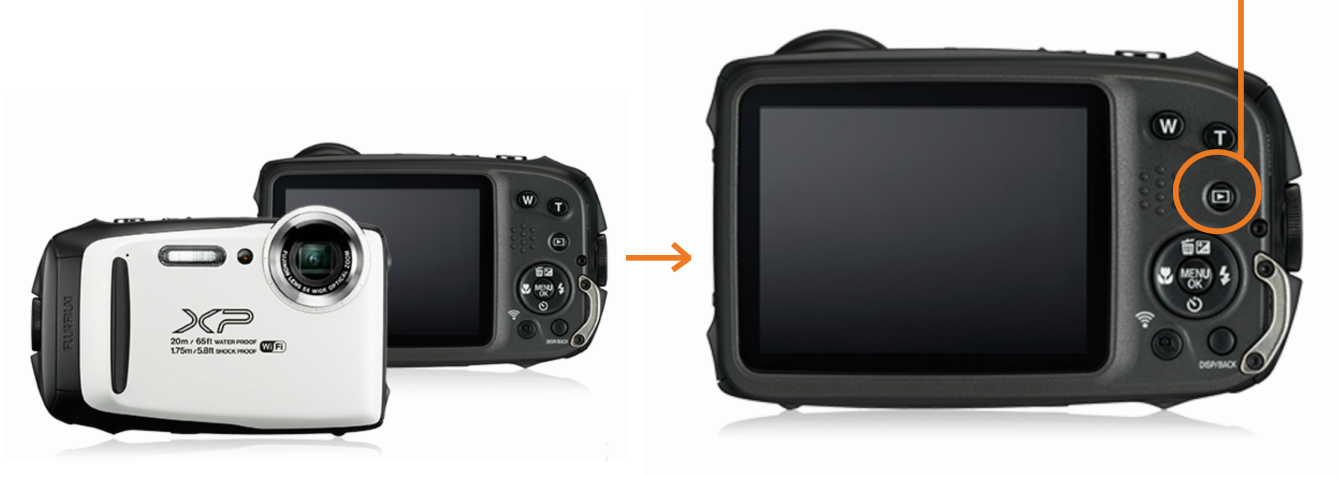

Press the left side of the large round button to look at the previous photo

Press the right side of the large round button to look at the next photo

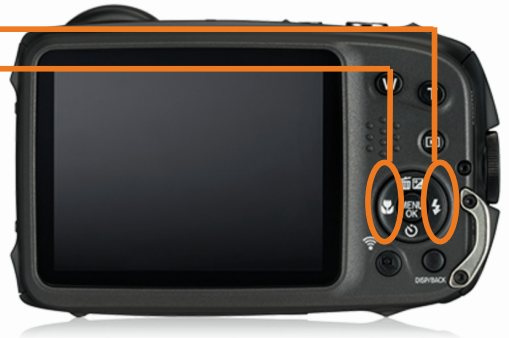

**CHECK** to be sure:

1. The photo is clear, in focus, and not blurry
2. All portions of the placenta are entirely contained in the photo
3. These are **NOT** in the photo:
  - a. Non-adherent blood clots
  - b. Blood on the disc of blue background
  - c. Hands
  - d. Feet
  - e. Clothing
  - f. Tools
  - g. Containers
  - h. Wipes or paper towels
  - i. Blood stains
  - j. Motion
  - k. Glare (reflection – use gauze to dry wet areas)
  - l. Uneven lighting, shadows
3. The placenta and cord are not be touching
4. The cord is not touching itself
5. The entire ruler is visible in the photo
6. There is space between the items – blue background is visible in-between each item

**TAKE MORE PHOTOGRAPHS** if you see any of these problems, or if you're not sure (it is easier to delete them later)
